# Supplementary material for: Investigation of milk proteins binding to the oral mucosa
Source: Royal Society of Chemistry journal article supplement (doi:10.1039/c3fo60291e), 2013-01-01
Supplement: c3fo60291e.pdf [file c3fo60291e.pdf]

## Electronic Supplementary information

for the paper

# Investigation of milk proteins binding to the oral mucosa

By

Caroline A. Withers<sup>a</sup>, Michael T. Cook<sup>b</sup>, Lisa Methven<sup>a</sup>, Margot A. Gosney<sup>cd</sup>, and  
Vitaliy V. Khutoryanskiy<sup>b\*</sup>

<sup>a</sup> Department of Food and Nutritional Sciences, University of Reading, Whiteknights, RG6  
6AP Reading, United Kingdom

<sup>b</sup> Department of Pharmacy, University of Reading, Whiteknights, RG6 6AD Reading, United  
Kingdom, Tel: +44 (0)11183786119 ; E-mail: [v.khutoryanskiy@reading.ac.uk](mailto:v.khutoryanskiy@reading.ac.uk)

<sup>c</sup> Clinical Health Sciences, University of Reading, London Road, RG1 5AQ Reading, United  
Kingdom

<sup>d</sup> Royal Berkshire NHS Trust, RG1 5AN Reading, United Kingdom

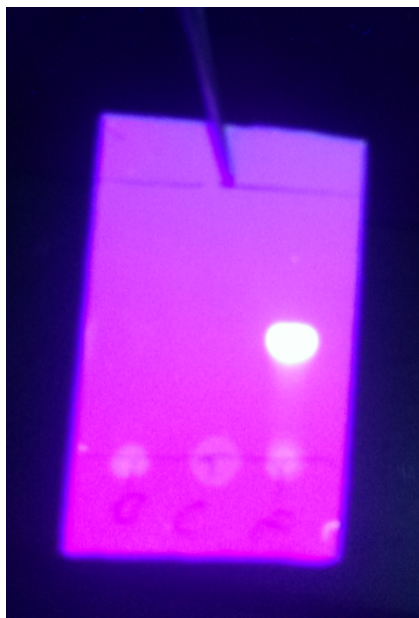

**Fig 1s.** TLC of labelled proteins and FITC using 1:1 THF:toluene as eluent. Spots are, from left to right, FITC- $\beta$ -lactoglobulin, FITC-casein and free FITC.

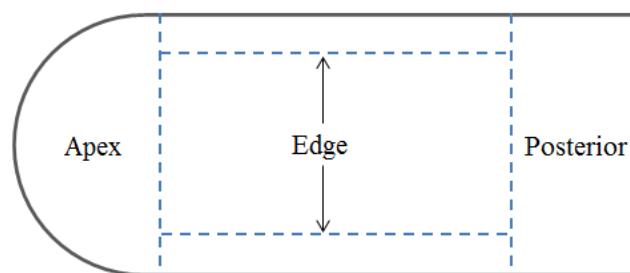

**Fig 2s.** Regions of porcine tongue dissected for tissue specimens

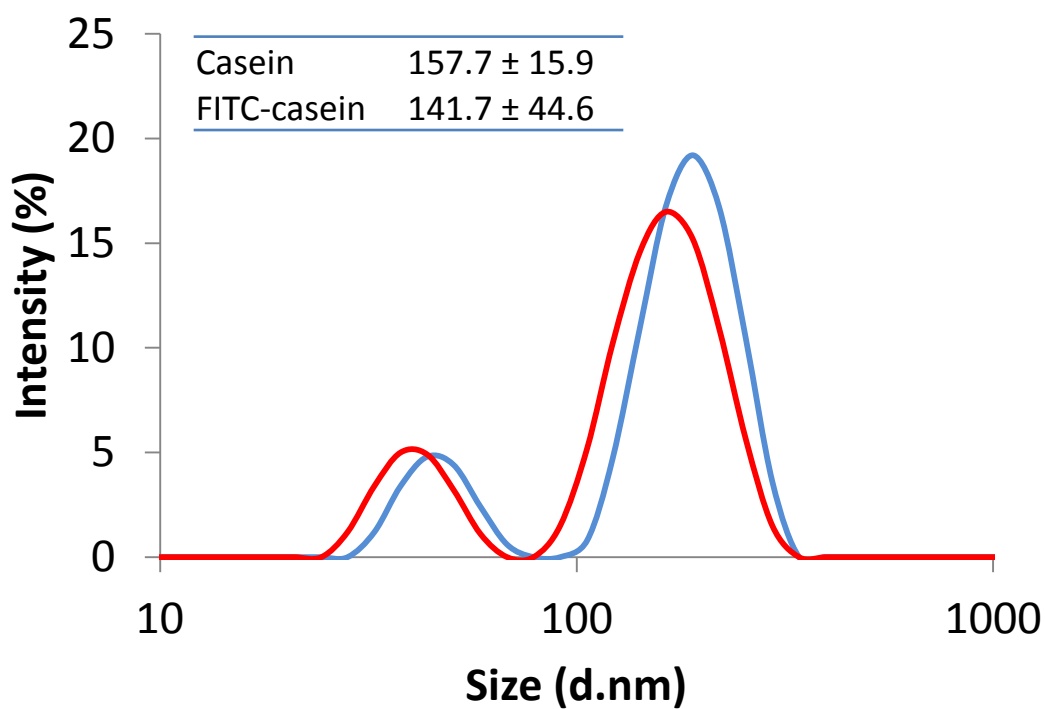

**Fig 3s.** Example dynamic light scattering data of casein (red) and FITC-casein (blue) solutions. Insert: average particle diameter ± standard deviation (n=3). T-testing (one-way) revealed no significant difference between the average particle diameters.
